# Supplementary material for: From quantum chemical formation free energies to evaporation rates
Source: Copernicus journal article supplement (doi:10.5194/acp-12-225-2012), 2012-01-04
Supplement: Supplementary file 1 [file xyz.pdf › xyz.pdf]

## H2SO4

7

|   |          |          |          |
|---|----------|----------|----------|
| S | 0.00000  | 0.00000  | 0.16525  |
| O | 0.00000  | 1.26281  | 0.82607  |
| O | 0.00000  | -1.26281 | 0.82607  |
| O | 1.24736  | -0.04726 | -0.85164 |
| O | -1.24736 | 0.04726  | -0.85164 |
| H | -1.45614 | -0.86095 | -1.11745 |
| H | 1.45614  | 0.86095  | -1.11745 |

## (H2SO4)2

14

|   |          |          |          |
|---|----------|----------|----------|
| S | -2.10168 | 0.06720  | 0.13003  |
| O | -1.45833 | 0.95689  | -0.99340 |
| O | -1.11544 | -0.22369 | 1.14212  |
| O | -2.32502 | -1.34478 | -0.60091 |
| O | -3.36039 | 0.64085  | 0.46002  |
| H | -0.49720 | 0.73023  | -1.10507 |
| H | -3.11441 | -1.28605 | -1.16074 |
| S | 2.10163  | -0.06727 | -0.13003 |
| O | 2.32538  | 1.34506  | 0.60016  |
| O | 1.11520  | 0.22320  | -1.14207 |
| O | 1.45846  | -0.95624 | 0.99405  |
| O | 3.36017  | -0.64130 | -0.45997 |
| H | 3.11483  | 1.28648  | 1.15995  |
| H | 0.49733  | -0.72959 | 1.10570  |

## (H2SO4)3

21

|   |          |          |          |
|---|----------|----------|----------|
| S | 0.23889  | 1.32218  | -0.06775 |
| O | -0.08527 | -0.03025 | -0.53661 |
| O | 1.34713  | 1.96195  | -0.71510 |
| H | 3.05453  | 1.12985  | -0.80430 |
| O | 0.44820  | 1.26739  | 1.48671  |
| O | -0.99976 | 2.23484  | -0.17148 |
| O | 3.78195  | 0.47267  | -0.77271 |
| S | 3.35233  | -0.77723 | 0.10392  |
| O | 4.49687  | -1.59365 | 0.26065  |
| O | 2.33074  | -1.55727 | -0.83284 |
| O | -2.51923 | -1.11432 | -1.06908 |
| H | 1.44138  | -1.14862 | -0.77305 |
| H | -1.61065 | -0.76685 | -0.88555 |
| O | 2.60941  | -0.29204 | 1.25382  |
| O | -3.15323 | 0.82296  | 0.31113  |
| H | 1.25122  | 0.70524  | 1.64899  |

|   |          |          |          |
|---|----------|----------|----------|
| H | -1.84617 | 1.74077  | 0.04326  |
| O | -4.85702 | -0.80146 | -0.54173 |
| S | -3.55631 | -0.51760 | -0.04612 |
| O | -3.28590 | -1.35781 | 1.28940  |
| H | -3.76006 | -2.20211 | 1.23252  |

(H2SO4)4

28

|   |          |          |          |
|---|----------|----------|----------|
| S | 2.01942  | -0.43944 | 0.61625  |
| O | 3.21017  | -1.09163 | 1.09475  |
| O | 0.82630  | -0.47432 | 1.42211  |
| O | 2.30459  | 1.07549  | 0.34478  |
| H | 3.23141  | 1.20231  | 0.00507  |
| O | 1.73379  | -1.06241 | -0.79430 |
| H | 0.81211  | -0.84564 | -1.09416 |
| S | 6.05084  | 0.53497  | -0.16122 |
| O | 7.30206  | 1.18357  | 0.02729  |
| O | 4.84514  | 1.27590  | -0.44084 |
| O | 5.81750  | -0.40339 | 1.07918  |
| O | 6.15437  | -0.49269 | -1.38799 |
| H | 7.04630  | -0.87265 | -1.40263 |
| H | 4.87794  | -0.71799 | 1.10779  |
| S | -2.01960 | -0.46713 | -0.59600 |
| O | -3.21007 | -1.14076 | -1.04451 |
| O | -0.82630 | -0.53879 | -1.39919 |
| O | -1.73432 | -1.02455 | 0.84179  |
| O | -2.30497 | 1.05868  | -0.39442 |
| H | -0.81253 | -0.79476 | 1.13143  |
| H | -3.23113 | 1.20064  | -0.05906 |
| S | -6.05056 | 0.54193  | 0.13759  |
| O | -5.81744 | -0.44819 | -1.06207 |
| O | -6.15448 | -0.43290 | 1.40667  |
| O | -4.84476 | 1.29380  | 0.38575  |
| O | -7.30162 | 1.18219  | -0.07847 |
| H | -7.04664 | -0.81135 | 1.43735  |
| H | -4.87865 | -0.76575 | -1.07600 |

H2SO4-NH3

11

|   |          |          |          |
|---|----------|----------|----------|
| S | -0.61420 | -0.11657 | 0.09700  |
| O | 0.40159  | -0.45210 | -1.04242 |
| O | 0.07328  | -0.07261 | 1.35642  |
| O | -0.99057 | 1.43239  | -0.20999 |
| O | -1.79359 | -0.89867 | -0.10978 |
| H | 1.37076  | -0.23941 | -0.72673 |
| H | -1.69153 | 1.43524  | -0.87732 |
| N | 2.77605  | 0.04129  | -0.05239 |
| H | 3.23015  | 0.91045  | -0.31557 |

|   |         |          |          |
|---|---------|----------|----------|
| H | 3.45311 | -0.70953 | -0.14648 |
| H | 2.50661 | 0.10720  | 0.92687  |

#### H2SO4-(NH3)2

-----  
15

|   |          |          |          |
|---|----------|----------|----------|
| N | 3.13680  | -0.84898 | 0.01388  |
| H | 3.07245  | -0.04524 | -0.60762 |
| H | 3.32696  | -1.67127 | -0.54994 |
| H | 3.92265  | -0.70633 | 0.64016  |
| N | -3.13686 | -0.84896 | -0.01383 |
| H | -3.92265 | -0.70685 | -0.64031 |
| H | -3.07274 | -0.04481 | 0.60717  |
| H | -3.32694 | -1.67094 | 0.55046  |
| S | 0.00001  | 0.46827  | -0.00002 |
| O | -1.01449 | 1.17784  | 0.73433  |
| O | 1.01455  | 1.17770  | -0.73445 |
| O | 0.70028  | -0.50852 | 1.02133  |
| O | -0.70028 | -0.50868 | -1.02122 |
| H | -1.64070 | -0.73399 | -0.68265 |
| H | 1.64070  | -0.73389 | 0.68279  |

#### H2SO4-(NH3)3

-----  
19

|   |              |              |              |
|---|--------------|--------------|--------------|
| S | -0.285701000 | 1.162060000  | -0.597054000 |
| O | 0.572781000  | 2.488916000  | -1.013071000 |
| O | 0.671645000  | 0.036987000  | -0.705990000 |
| O | -1.373925000 | 1.060526000  | -1.568565000 |
| O | -0.691028000 | 1.449258000  | 0.769866000  |
| H | 0.787980000  | 2.399287000  | -1.951168000 |
| N | -0.553848000 | -2.091184000 | 0.421171000  |
| H | -0.149229000 | -3.022437000 | 0.395768000  |
| H | 0.066083000  | -1.384193000 | -0.058481000 |
| H | -1.476680000 | -2.054719000 | -0.098960000 |
| H | -0.670226000 | -1.742966000 | 1.415795000  |
| N | -0.735382000 | -0.659192000 | 2.843819000  |
| H | -1.585833000 | -0.606897000 | 3.396736000  |
| H | 0.042564000  | -0.680193000 | 3.496758000  |
| H | -0.665046000 | 0.213120000  | 2.307902000  |
| N | -2.843842000 | -1.513742000 | -1.146572000 |
| H | -2.476404000 | -0.595425000 | -1.423649000 |
| H | -3.740747000 | -1.351632000 | -0.697480000 |
| H | -3.030820000 | -2.034794000 | -1.998518000 |

#### H2SO4-(NH3)4

-----  
23

|   |         |          |         |
|---|---------|----------|---------|
| S | 0.58830 | -0.33140 | 0.27326 |
|---|---------|----------|---------|

|   |          |          |          |
|---|----------|----------|----------|
| O | 1.90850  | -1.11795 | 0.69514  |
| O | -0.23274 | -0.33906 | 1.50138  |
| O | -0.04385 | -1.06399 | -0.82730 |
| O | 1.01557  | 1.02645  | -0.12355 |
| H | 2.69473  | -0.72660 | 0.20454  |
| N | -2.69424 | 0.45115  | 0.80702  |
| H | -3.40474 | 0.61338  | 1.51417  |
| H | -1.78341 | 0.11327  | 1.23545  |
| H | -2.98874 | -0.29871 | 0.12122  |
| H | -2.44181 | 1.34309  | 0.29912  |
| N | -1.46836 | 2.64937  | -0.51399 |
| H | -1.63829 | 2.81031  | -1.50257 |
| H | -1.42256 | 3.56147  | -0.06894 |
| H | -0.53679 | 2.22155  | -0.43341 |
| N | -2.90125 | -1.68199 | -1.02818 |
| H | -1.87431 | -1.67018 | -1.05957 |
| H | -3.23800 | -1.58356 | -1.98118 |
| H | -3.18750 | -2.60109 | -0.70411 |
| N | 3.82669  | 0.27147  | -0.63063 |
| H | 3.12512  | 1.00371  | -0.73398 |
| H | 4.14767  | -0.00365 | -1.55252 |
| H | 4.61601  | 0.64578  | -0.11534 |

NH3

4

|   |          |          |          |
|---|----------|----------|----------|
| N | 0.00000  | 0.00000  | 0.11611  |
| H | 0.00000  | 0.93930  | -0.27093 |
| H | 0.81346  | -0.46965 | -0.27093 |
| H | -0.81346 | -0.46965 | -0.27093 |

(H2SO4)2-NH3

18

|   |          |          |          |
|---|----------|----------|----------|
| S | 1.82137  | -0.35028 | -0.04742 |
| O | 2.45017  | 0.85230  | -0.62365 |
| O | 1.07612  | 0.00751  | 1.17781  |
| O | 3.02858  | -1.32222 | 0.39100  |
| O | 1.06466  | -1.16748 | -0.97967 |
| H | 1.42724  | 2.09442  | -0.31716 |
| H | 3.65576  | -0.80945 | 0.92035  |
| S | -2.12174 | -0.12570 | -0.01143 |
| O | -1.50439 | -0.49166 | 1.39086  |
| O | -3.53339 | -0.22814 | 0.08340  |
| O | -1.61394 | -1.26387 | -0.96947 |
| O | -1.52786 | 1.13490  | -0.45078 |
| H | -0.51089 | -0.36289 | 1.37715  |
| H | -0.61957 | -1.24844 | -1.04282 |
| N | 0.61482  | 2.72437  | -0.04303 |
| H | -0.26049 | 2.14961  | -0.13693 |

|   |         |         |          |
|---|---------|---------|----------|
| H | 0.56318 | 3.54518 | -0.64257 |
| H | 0.72725 | 3.00590 | 0.92895  |

(H<sub>2</sub>SO<sub>4</sub>)<sub>2</sub>-(NH<sub>3</sub>)<sub>2</sub>

-----  
22

|   |          |          |          |
|---|----------|----------|----------|
| S | 2.16488  | -0.00019 | -0.13611 |
| O | 2.19410  | -1.22168 | 0.68654  |
| O | 3.55598  | 0.00549  | -0.96778 |
| O | 1.15849  | -0.00686 | -1.18600 |
| O | 2.17378  | 1.22370  | 0.67936  |
| H | 0.76396  | -2.03997 | 0.89762  |
| H | 4.28181  | 0.02771  | -0.32823 |
| S | -2.27092 | 0.04530  | -0.20206 |
| O | -2.06988 | 1.41016  | -0.71658 |
| O | -1.42086 | -0.93735 | -1.19106 |
| O | -1.57039 | -0.09193 | 1.12030  |
| O | -3.60332 | -0.47837 | -0.22841 |
| H | -0.90247 | 2.16925  | 0.13959  |
| H | -0.53775 | -0.53050 | -1.34624 |
| N | -0.25491 | 2.42734  | 0.94140  |
| H | -0.24662 | 3.42857  | 1.11578  |
| H | -0.64398 | 1.91486  | 1.73528  |
| H | 0.71438  | 2.05785  | 0.76909  |
| N | -0.22813 | -2.37626 | 1.02186  |
| H | -0.29390 | -3.08555 | 1.74671  |
| H | -0.82320 | -1.51583 | 1.23661  |
| H | -0.57755 | -2.73099 | 0.13081  |

(H<sub>2</sub>SO<sub>4</sub>)<sub>2</sub>-(NH<sub>3</sub>)<sub>3</sub>

-----  
26

|   |              |              |              |
|---|--------------|--------------|--------------|
| S | 1.637549000  | 0.688279000  | -0.688183000 |
| O | 0.254896000  | 1.046935000  | -1.190036000 |
| N | -1.066714000 | -1.331867000 | -1.532552000 |
| H | -1.811628000 | -1.439886000 | -2.215406000 |
| H | -0.674735000 | -0.360005000 | -1.555940000 |
| O | 2.502445000  | 0.213625000  | -1.742431000 |
| O | 1.393976000  | -0.635117000 | 0.214496000  |
| N | 1.344113000  | -2.665069000 | -2.072766000 |
| H | 1.552708000  | -3.278099000 | -2.855028000 |
| H | -0.247688000 | -1.982075000 | -1.747316000 |
| N | -0.453349000 | 2.831484000  | 0.693469000  |
| H | -0.636849000 | 3.821942000  | 0.561417000  |
| H | -1.235882000 | 2.343588000  | 1.191221000  |
| S | -1.778472000 | -0.106626000 | 1.937696000  |
| O | -0.332688000 | 0.038173000  | 2.171873000  |
| O | -2.111100000 | -1.240325000 | 1.071907000  |
| O | -2.423582000 | 1.155043000  | 1.575227000  |
| H | 0.835139000  | -0.402649000 | 0.998881000  |

|   |              |              |              |
|---|--------------|--------------|--------------|
| O | 2.123098000  | 1.739206000  | 0.193567000  |
| H | 1.676774000  | -3.120825000 | -1.227435000 |
| H | 1.912206000  | -1.819796000 | -2.169235000 |
| H | -1.443251000 | -1.469216000 | -0.574220000 |
| H | -0.309031000 | 2.321745000  | -0.218086000 |
| H | 0.438816000  | 2.685709000  | 1.177936000  |
| O | -2.436797000 | -0.432633000 | 3.385127000  |
| H | -2.027396000 | -1.244858000 | 3.714710000  |

(H2SO4)2-(NH3)4

30

|   |          |          |          |
|---|----------|----------|----------|
| S | -1.85784 | 0.31946  | -0.58183 |
| O | -1.33947 | 0.57265  | 0.79871  |
| O | -3.22755 | -0.14186 | -0.60945 |
| O | -1.02200 | -0.96452 | -1.10451 |
| O | -1.51469 | 1.43971  | -1.46381 |
| H | -0.06784 | -0.72442 | -1.23942 |
| N | -0.57115 | -1.84506 | 1.78972  |
| H | 0.38849  | -1.92500 | 1.39727  |
| H | -0.55084 | -2.02128 | 2.79022  |
| H | -1.26940 | -2.48032 | 1.30043  |
| H | -0.88878 | -0.86431 | 1.58548  |
| N | -2.60373 | -3.11986 | 0.30119  |
| H | -3.29291 | -3.79837 | 0.61073  |
| H | -2.18793 | -3.47166 | -0.55693 |
| H | -3.09646 | -2.26602 | 0.02966  |
| N | 0.73556  | 2.71095  | -0.45931 |
| H | 1.19517  | 3.39790  | -1.05031 |
| H | 1.43284  | 2.02713  | -0.09494 |
| H | 0.23267  | 3.16543  | 0.35466  |
| H | -0.00416 | 2.20259  | -0.99582 |
| S | 2.37992  | -0.46002 | -0.04669 |
| O | 1.58425  | -0.38507 | -1.28265 |
| O | 2.02779  | -1.60885 | 0.79345  |
| O | 2.47169  | 0.81504  | 0.65700  |
| O | 3.91432  | -0.71107 | -0.52638 |
| H | 3.92592  | -1.53381 | -1.03475 |
| N | -0.94374 | 3.43449  | 1.67147  |
| H | -1.32541 | 2.48736  | 1.60538  |
| H | -0.61075 | 3.57604  | 2.62001  |
| H | -1.70688 | 4.08579  | 1.51435  |

(NH3)2

8

|   |          |          |          |
|---|----------|----------|----------|
| N | 1.54381  | -0.00000 | -0.08119 |
| N | -1.54382 | -0.00001 | 0.08119  |
| H | -2.12616 | 0.81510  | -0.08516 |
| H | -0.81675 | 0.00001  | -0.63083 |

|   |          |          |          |
|---|----------|----------|----------|
| H | -2.12621 | -0.81506 | -0.08521 |
| H | 0.81680  | 0.00000  | 0.63089  |
| H | 2.12620  | -0.81507 | 0.08515  |
| H | 2.12619  | 0.81508  | 0.08511  |

(H<sub>2</sub>SO<sub>4</sub>)<sub>3</sub>-(NH<sub>3</sub>)<sub>1</sub>

-----  
25

|   |          |          |          |
|---|----------|----------|----------|
| N | -0.12815 | 0.45147  | 2.58768  |
| H | -1.02102 | 0.22676  | 2.09870  |
| H | 0.53597  | -0.30090 | 2.34936  |
| H | -0.26920 | 0.51080  | 3.59306  |
| S | 1.15991  | 2.06506  | -0.16914 |
| O | 0.05311  | 1.17452  | -0.55407 |
| O | 1.08786  | 2.51127  | 1.21286  |
| H | 0.26898  | 1.33980  | 2.20484  |
| O | 2.45073  | 1.48146  | -0.58063 |
| S | -2.92638 | -0.31834 | -0.11935 |
| O | -2.24906 | -1.32155 | -1.13732 |
| O | -2.56670 | 1.10382  | -0.68710 |
| O | -4.33302 | -0.47256 | -0.22204 |
| O | -2.26605 | -0.49000 | 1.16727  |
| H | -1.32207 | -1.53143 | -0.88287 |
| H | -1.57997 | 1.24858  | -0.65963 |
| S | 1.61244  | -1.85650 | -0.06169 |
| O | 2.45221  | -3.21033 | -0.01836 |
| O | 2.48419  | -1.00566 | -1.00717 |
| O | 0.33800  | -2.16845 | -0.66489 |
| O | 1.64445  | -1.33354 | 1.28018  |
| H | 2.16329  | -3.78099 | -0.74633 |
| H | 2.45292  | 0.01523  | -0.81193 |
| O | 1.01051  | 3.43170  | -1.00579 |
| H | 1.28256  | 3.26308  | -1.91968 |

(H<sub>2</sub>SO<sub>4</sub>)<sub>3</sub>-(NH<sub>3</sub>)<sub>2</sub>

-----  
29

|   |          |          |          |
|---|----------|----------|----------|
| N | 0.03694  | -2.05892 | 0.29910  |
| H | -0.84102 | -2.22589 | -0.23372 |
| H | 0.90220  | -2.17490 | -0.25204 |
| H | 0.06101  | -2.66286 | 1.11764  |
| N | -2.42210 | 1.99063  | 1.75362  |
| H | -3.27761 | 2.52372  | 1.61018  |
| H | -2.06907 | 2.15428  | 2.69418  |
| H | -2.62740 | 0.96205  | 1.61849  |
| S | -3.18923 | -0.85606 | -0.14188 |
| O | -2.54650 | -2.04767 | -0.69408 |
| O | -2.96716 | 0.36032  | -0.93718 |
| O | -2.92052 | -0.64059 | 1.28659  |
| H | -1.35318 | 0.64965  | -1.42971 |

|   |          |          |          |
|---|----------|----------|----------|
| S | 0.30608  | 1.56860  | -0.41267 |
| O | -0.37161 | 0.71659  | -1.57453 |
| O | 1.60670  | 1.93930  | -0.93127 |
| O | -0.59623 | 2.67863  | -0.09404 |
| O | 0.40765  | 0.64164  | 0.76568  |
| H | 0.04062  | -1.05809 | 0.59408  |
| H | -1.69494 | 2.29469  | 1.04117  |
| O | -4.78207 | -1.13521 | -0.16612 |
| H | -5.02859 | -1.38441 | -1.06883 |
| S | 3.58345  | -0.73453 | 0.12582  |
| O | 3.90821  | 0.56379  | -0.70173 |
| O | 2.88461  | -0.17905 | 1.44333  |
| O | 4.81568  | -1.32197 | 0.51669  |
| O | 2.59982  | -1.51642 | -0.60307 |
| H | 3.07381  | 1.06299  | -0.90985 |
| H | 1.99675  | 0.21387  | 1.22689  |

(H2SO4)3-(NH3)3

---

33

|   |              |              |              |
|---|--------------|--------------|--------------|
| S | 2.814485000  | -1.230928000 | 0.040528000  |
| O | 1.779295000  | -2.263638000 | -0.010616000 |
| O | 4.230395000  | -2.011549000 | 0.218819000  |
| O | 3.013021000  | -0.502739000 | -1.213671000 |
| H | 4.119054000  | -2.667548000 | 0.921393000  |
| S | -2.993306000 | -1.056250000 | -0.022080000 |
| O | -3.209010000 | 0.371743000  | 0.148853000  |
| O | -4.415438000 | -1.684376000 | 0.445704000  |
| O | -2.796708000 | -1.507941000 | -1.408285000 |
| H | -4.410579000 | -2.620725000 | 0.203486000  |
| S | -0.356528000 | 2.271409000  | -0.028759000 |
| O | 0.164668000  | 0.936847000  | -0.416429000 |
| O | -0.586668000 | 2.330128000  | 1.419050000  |
| O | -1.743117000 | 2.470138000  | -0.769538000 |
| O | 0.502191000  | 3.340936000  | -0.546029000 |
| H | 2.032846000  | 2.662715000  | -0.550009000 |
| O | 2.678089000  | -0.344710000 | 1.212449000  |
| N | -0.061958000 | -0.231931000 | 2.253209000  |
| N | 2.929161000  | 2.115931000  | -0.412685000 |
| N | -0.111521000 | -1.317856000 | -1.888717000 |
| H | 3.749256000  | 2.683847000  | -0.609906000 |
| H | 2.961351000  | 1.761762000  | 0.548835000  |
| H | 2.927779000  | 1.241481000  | -0.982859000 |
| H | -2.361261000 | 1.754707000  | -0.467407000 |
| H | 0.490513000  | -1.889473000 | -1.269610000 |
| H | 0.202319000  | -1.398192000 | -2.851876000 |
| H | -1.123742000 | -1.569362000 | -1.788999000 |
| H | -0.013044000 | -0.336295000 | -1.548710000 |
| H | 0.888807000  | -0.403941000 | 1.885322000  |
| H | -0.767518000 | -0.805252000 | 1.731144000  |
| H | -0.294042000 | 0.775643000  | 2.078869000  |



|   |              |              |             |
|---|--------------|--------------|-------------|
| H | -0.103705000 | -0.447341000 | 3.245745000 |
| O | -1.973398000 | -1.627353000 | 0.873826000 |

(H2SO4)3-(NH3)4

-----  
37

|   |              |              |              |
|---|--------------|--------------|--------------|
| S | -0.000214000 | -1.498379000 | -3.321132000 |
| O | 0.506945000  | -2.585223000 | -2.474876000 |
| O | 0.421176000  | -1.874768000 | -4.846205000 |
| O | -1.454056000 | -1.428484000 | -3.421069000 |
| H | 1.381266000  | -1.990147000 | -4.861410000 |
| S | 2.637894000  | 1.646732000  | 1.044753000  |
| O | 1.514673000  | 2.592080000  | 0.832361000  |
| O | 3.956864000  | 2.575237000  | 1.278163000  |
| O | 2.539642000  | 0.901675000  | 2.288918000  |
| H | 4.203697000  | 2.950691000  | 0.421712000  |
| S | -1.831077000 | -0.151548000 | 1.039421000  |
| O | -2.367709000 | 0.639917000  | -0.136106000 |
| O | -2.340800000 | -1.542676000 | 0.955023000  |
| O | -2.211261000 | 0.504402000  | 2.317930000  |
| O | -0.331185000 | -0.127977000 | 0.941663000  |
| H | 0.752609000  | 1.054676000  | 3.105532000  |
| O | 0.651468000  | -0.216688000 | -3.022985000 |
| N | -0.232018000 | 1.806636000  | -1.320023000 |
| N | -0.024097000 | 1.730080000  | 3.120106000  |
| N | 1.569066000  | -1.634103000 | -0.073885000 |
| N | -3.369896000 | -1.523678000 | -1.463504000 |
| H | 2.231861000  | -0.848935000 | -0.204489000 |
| H | 0.714822000  | -1.202757000 | 0.389340000  |
| H | 1.283961000  | -2.039365000 | -0.989184000 |
| H | 1.981506000  | -2.344236000 | 0.524392000  |
| H | 0.240014000  | 2.386267000  | 2.372261000  |
| H | -0.071635000 | 2.205419000  | 4.017062000  |
| H | -0.952240000 | 1.237768000  | 2.863722000  |
| H | -2.668854000 | -1.667128000 | -2.220645000 |
| H | -3.453380000 | -0.507600000 | -1.308415000 |
| H | -4.260554000 | -1.961015000 | -1.678362000 |
| H | -2.979227000 | -1.821711000 | -0.518704000 |
| H | 0.158179000  | 1.077971000  | -1.951919000 |
| H | 0.456169000  | 2.053878000  | -0.585006000 |
| H | -1.099950000 | 1.407165000  | -0.856111000 |
| H | -0.467082000 | 2.632430000  | -1.864352000 |
| O | 2.915551000  | 0.852043000  | -0.154389000 |

(NH3)3

-----  
12

|   |          |         |         |
|---|----------|---------|---------|
| N | 1.78681  | 0.13950 | 0.00000 |
| N | -1.01422 | 1.47768 | 0.00000 |
| H | -1.23872 | 2.04058 | 0.81500 |

|   |          |          |          |
|---|----------|----------|----------|
| H | 0.00000  | 1.32438  | 0.00000  |
| H | -1.23872 | 2.04058  | -0.81500 |
| H | 1.14694  | -0.66219 | 0.00000  |
| H | 2.38655  | 0.05247  | -0.81500 |
| H | 2.38655  | 0.05247  | 0.81500  |
| N | -0.77260 | -1.61717 | 0.00000  |
| H | -1.14783 | -2.09305 | -0.81500 |
| H | -1.14694 | -0.66219 | 0.00000  |
| H | -1.14783 | -2.09305 | 0.81500  |

(H2SO4)4-(NH3)1

-----  
32

|   |          |          |          |
|---|----------|----------|----------|
| N | -1.84333 | 0.39447  | 2.54204  |
| H | -2.43956 | 0.64495  | 3.32758  |
| H | -2.41453 | 0.21779  | 1.70042  |
| H | -1.31925 | -0.47164 | 2.74629  |
| S | 0.26631  | -2.10506 | 1.24036  |
| O | 0.17033  | -0.86245 | 0.48841  |
| O | -0.45469 | -2.14226 | 2.48683  |
| H | -1.17361 | 1.18012  | 2.32334  |
| O | -0.20589 | -3.27663 | 0.29681  |
| S | 3.07485  | -0.15925 | -0.92644 |
| O | 1.69104  | -0.14696 | -1.70268 |
| O | 2.84044  | 0.84769  | 0.25545  |
| O | 3.25270  | -1.45281 | -0.27982 |
| O | 4.06348  | 0.28180  | -1.84553 |
| H | 0.97594  | -0.42572 | -1.08892 |
| H | 2.23918  | 1.60720  | 0.00593  |
| S | -2.58581 | -0.76023 | -1.17776 |
| O | -3.81671 | -0.61154 | -2.18342 |
| O | -2.03488 | -2.08361 | -1.37194 |
| O | -1.56313 | 0.27261  | -1.68398 |
| O | -3.12236 | -0.39737 | 0.10687  |
| H | -3.59486 | -1.03959 | -3.02480 |
| H | -0.89916 | -2.92928 | -0.31986 |
| O | 1.73273  | -2.48452 | 1.51525  |
| H | 2.35856  | -2.09009 | 0.81012  |
| S | -0.21258 | 2.82797  | 0.45712  |
| O | -0.47829 | 4.41178  | 0.57864  |
| O | -0.15904 | 2.39762  | 1.84856  |
| O | 1.02156  | 2.67255  | -0.30672 |
| H | -0.32541 | 4.81299  | -0.28935 |
| O | -1.40039 | 2.29113  | -0.25081 |
| H | -1.48317 | 1.14095  | -1.09279 |

(H2SO4)4-(NH3)2

-----  
36

|   |          |         |         |
|---|----------|---------|---------|
| N | -1.97546 | 2.21625 | 0.25455 |
|---|----------|---------|---------|

|   |          |          |          |
|---|----------|----------|----------|
| H | -1.12999 | 2.55531  | -0.24052 |
| H | -2.80519 | 2.09626  | -0.34784 |
| H | -2.19715 | 2.83941  | 1.02794  |
| N | 1.41601  | -1.19962 | 1.98551  |
| H | 2.37606  | -1.51551 | 1.79435  |
| H | 1.14021  | -1.44262 | 2.93399  |
| H | 1.38617  | -0.16423 | 1.85208  |
| S | 1.61209  | 1.83353  | -0.05026 |
| O | 0.61993  | 2.74450  | -0.58240 |
| O | 1.69834  | 0.55719  | -0.84209 |
| O | 1.48079  | 1.52166  | 1.37591  |
| H | 0.11613  | -0.08362 | -1.32101 |
| S | -1.32263 | -1.33704 | -0.31971 |
| O | -0.83123 | -0.32674 | -1.46015 |
| O | -2.46630 | -2.01475 | -0.89388 |
| O | -0.18325 | -2.18389 | 0.03141  |
| O | -1.70414 | -0.46442 | 0.84140  |
| H | -1.76642 | 1.25668  | 0.61028  |
| H | 0.76104  | -1.64258 | 1.28812  |
| O | 2.99471  | 2.58705  | -0.27379 |
| H | 3.73106  | 2.03474  | 0.06578  |
| S | -5.09394 | 0.06571  | 0.02702  |
| O | -5.05948 | -1.29547 | -0.76193 |
| O | -4.34575 | -0.26768 | 1.39190  |
| O | -6.44758 | 0.34997  | 0.34672  |
| O | -4.29099 | 1.03915  | -0.69227 |
| H | -4.12064 | -1.56957 | -0.93640 |
| H | -3.38024 | -0.43534 | 1.22683  |
| S | 4.65763  | -0.73136 | -0.00276 |
| O | 3.84240  | -0.76621 | -1.33194 |
| O | 6.00369  | -1.41388 | -0.48308 |
| O | 4.91468  | 0.64133  | 0.37383  |
| O | 4.10814  | -1.62250 | 0.98070  |
| H | 6.49740  | -0.79919 | -1.04831 |
| H | 2.98572  | -0.22230 | -1.21713 |

(H2SO4)4-(NH3)3

-----  
40

|   |          |          |          |
|---|----------|----------|----------|
| S | -1.56338 | -2.29988 | 0.46388  |
| O | -1.49961 | -1.82922 | -0.94333 |
| O | -3.08417 | -2.71790 | 0.72511  |
| O | -0.79146 | -3.49699 | 0.70471  |
| H | -3.65355 | -1.94869 | 0.51948  |
| S | 3.04750  | -1.15181 | -0.45097 |
| O | 3.32701  | -1.46815 | 0.95434  |
| O | 1.43177  | -0.90905 | -0.50484 |
| O | 3.66297  | 0.07938  | -0.93100 |
| H | 1.21497  | 0.06319  | -0.55871 |
| S | 1.58479  | 2.56840  | 0.39362  |
| O | 1.06051  | 3.92801  | 0.34866  |

|   |          |          |          |
|---|----------|----------|----------|
| O | 0.77729  | 1.64724  | -0.47332 |
| O | 1.75591  | 2.01701  | 1.73660  |
| O | 3.01467  | 2.66207  | -0.28902 |
| H | 3.34428  | 1.74615  | -0.48117 |
| O | -1.27365 | -1.19211 | 1.41003  |
| N | -1.08039 | 3.49847  | -1.24464 |
| N | 1.31610  | -0.56430 | 2.53237  |
| N | 0.82572  | -3.46370 | -1.64223 |
| H | 1.40315  | -0.71417 | 3.53415  |
| H | 0.41247  | -0.92583 | 2.18797  |
| H | 1.38864  | 0.45561  | 2.30823  |
| H | 2.10388  | -1.03089 | 2.01293  |
| H | 1.81797  | -3.08093 | -1.55859 |
| H | 0.49738  | -3.82631 | -0.73493 |
| H | 0.19057  | -2.67965 | -1.83575 |
| H | 0.75440  | -4.17839 | -2.36210 |
| H | -1.06430 | 3.94915  | -2.15643 |
| H | -0.61411 | 2.56878  | -1.28461 |
| H | -2.05010 | 3.37728  | -0.92105 |
| H | -0.47251 | 4.00785  | -0.56591 |
| O | 3.21495  | -2.31067 | -1.33924 |
| S | -3.23208 | 1.01393  | -0.27443 |
| O | -2.24810 | 0.61632  | -1.44494 |
| O | -2.28491 | 1.20061  | 0.96968  |
| O | -3.70372 | 2.33074  | -0.59907 |
| O | -4.14276 | -0.07514 | -0.02885 |
| H | -1.89028 | 0.31314  | 1.22222  |
| H | -1.93601 | -0.33706 | -1.32206 |

(H2SO4)4-(NH3)4

-----  
44

|   |          |          |          |
|---|----------|----------|----------|
| S | 3.79876  | -1.35569 | -0.57027 |
| O | 4.28274  | -0.33948 | 0.36691  |
| O | 4.76061  | -1.26108 | -1.87597 |
| O | 3.92670  | -2.72583 | -0.05767 |
| O | 2.47349  | -1.08276 | -1.12290 |
| H | 5.67813  | -1.30628 | -1.57086 |
| S | 0.30438  | 3.82241  | -0.03562 |
| O | -1.16090 | 3.87286  | -0.10222 |
| O | 0.83072  | 5.05031  | -0.95722 |
| O | 0.85772  | 3.98208  | 1.29617  |
| O | 0.87818  | 2.65910  | -0.75179 |
| H | 0.45865  | 5.86762  | -0.59613 |
| S | -0.72949 | -1.29390 | 1.50522  |
| O | -0.65853 | -1.79713 | 0.05104  |
| O | 0.16473  | -2.11863 | 2.32827  |
| O | -2.13925 | -1.33054 | 1.95045  |
| O | -0.26665 | 0.13945  | 1.48059  |
| N | -2.45324 | 1.76622  | 1.08626  |
| H | -1.65419 | 1.17903  | 1.42832  |

|   |          |          |          |
|---|----------|----------|----------|
| H | -2.06527 | 2.66647  | 0.72414  |
| H | -3.13293 | 1.91622  | 1.82739  |
| H | -2.87990 | 1.24582  | 0.29904  |
| N | 0.11865  | 0.19760  | -1.75216 |
| H | 1.06761  | -0.16471 | -1.92865 |
| H | 0.20592  | 1.17504  | -1.40587 |
| H | -0.28576 | -0.42524 | -1.01810 |
| H | -0.46923 | 0.16987  | -2.58171 |
| N | 2.23882  | 1.29416  | 1.30941  |
| H | 1.96251  | 1.85781  | 0.48489  |
| H | 1.39847  | 0.72397  | 1.55063  |
| H | 3.05148  | 0.68980  | 1.06847  |
| H | 2.44956  | 1.94128  | 2.06585  |
| N | 1.43067  | -3.66101 | 0.51946  |
| H | 2.42535  | -3.39221 | 0.31318  |
| H | 0.81075  | -3.22288 | -0.17308 |
| H | 1.30937  | -4.67010 | 0.53104  |
| H | 1.09860  | -3.22382 | 1.41437  |
| S | -3.79702 | -1.11423 | -1.01964 |
| O | -4.26885 | -1.25252 | 0.47617  |
| O | -4.92791 | -1.27750 | -1.86442 |
| O | -2.82596 | -2.33122 | -1.22574 |
| O | -2.99724 | 0.10776  | -1.12203 |
| H | -3.46252 | -1.32646 | 1.08423  |
| H | -1.97391 | -2.17653 | -0.69015 |

(NH3)4

-----  
16

|   |          |          |          |
|---|----------|----------|----------|
| N | -1.54344 | 1.54344  | 0.00041  |
| N | 1.54344  | 1.54344  | -0.00041 |
| H | 1.90033  | 2.03690  | 0.81305  |
| H | 0.51953  | 1.65368  | -0.00015 |
| H | 1.89983  | 2.03628  | -0.81447 |
| H | -1.65368 | 0.51953  | 0.00015  |
| H | -2.03628 | 1.89983  | 0.81447  |
| H | -2.03690 | 1.90033  | -0.81305 |
| N | -1.54344 | -1.54344 | -0.00041 |
| H | -1.90033 | -2.03690 | 0.81305  |
| H | -0.51953 | -1.65368 | -0.00015 |
| H | -1.89983 | -2.03628 | -0.81447 |
| N | 1.54344  | -1.54344 | 0.00041  |
| H | 2.03690  | -1.90033 | -0.81305 |
| H | 2.03628  | -1.89983 | 0.81447  |
| H | 1.65368  | -0.51953 | 0.00015  |

(H2SO4)1-(DMA)1

-----  
17

|   |         |          |         |
|---|---------|----------|---------|
| H | 1.20266 | -0.11641 | 0.80551 |
|---|---------|----------|---------|

|   |          |          |          |
|---|----------|----------|----------|
| S | -1.28566 | -0.15981 | 0.01278  |
| O | -1.79996 | 1.40526  | 0.03811  |
| O | -0.43906 | -0.25916 | -1.20271 |
| O | -2.46902 | -0.97911 | -0.01043 |
| O | -0.45644 | -0.21585 | 1.23005  |
| H | -2.60080 | 1.43854  | -0.50189 |
| N | 1.88260  | -0.02687 | 0.00787  |
| H | 1.15942  | -0.13011 | -0.76016 |
| C | 2.85648  | -1.14047 | -0.00738 |
| H | 3.50399  | -1.07711 | 0.86762  |
| H | 3.45913  | -1.08826 | -0.91447 |
| H | 2.30579  | -2.07980 | 0.01158  |
| C | 2.45983  | 1.33730  | -0.01614 |
| H | 3.09396  | 1.48470  | 0.85839  |
| H | 1.63904  | 2.05286  | -0.00015 |
| H | 3.04708  | 1.47061  | -0.92491 |

(H<sub>2</sub>SO<sub>4</sub>)<sub>1</sub>-(DMA)<sub>2</sub>

---

27

|   |          |          |          |
|---|----------|----------|----------|
| S | -0.05346 | -0.75313 | -0.01507 |
| O | 0.73208  | 0.01994  | 1.14788  |
| O | 0.88284  | -1.65436 | -0.65637 |
| O | -0.56009 | 0.31231  | -0.93345 |
| O | -1.18120 | -1.38997 | 0.69573  |
| H | 1.66961  | 0.20981  | 0.80386  |
| H | -2.58358 | -0.45900 | 0.47578  |
| C | -4.13767 | 0.05424  | -0.85565 |
| H | -4.97075 | -0.29846 | -0.24636 |
| H | -3.82859 | -0.73235 | -1.54257 |
| H | -4.44564 | 0.93346  | -1.42262 |
| N | -2.98942 | 0.39533  | 0.00965  |
| C | -3.22689 | 1.45819  | 1.01174  |
| H | -2.11461 | 0.61466  | -0.56050 |
| H | -4.03076 | 1.15945  | 1.68546  |
| H | -2.30729 | 1.60118  | 1.57749  |
| H | -3.49586 | 2.38639  | 0.50651  |
| N | 3.12663  | 0.29244  | -0.05477 |
| C | 4.38939  | 0.17694  | 0.67421  |
| C | 3.09468  | 1.40216  | -1.01168 |
| H | 2.92036  | -0.57731 | -0.54277 |
| H | 4.53487  | 1.06377  | 1.29730  |
| H | 4.35211  | -0.69535 | 1.32939  |
| H | 5.26204  | 0.08103  | 0.01083  |
| H | 3.18358  | 2.34913  | -0.47179 |
| H | 3.90691  | 1.35298  | -1.75183 |
| H | 2.13646  | 1.39369  | -1.53317 |

(H<sub>2</sub>SO<sub>4</sub>)<sub>1</sub>-(DMA)<sub>3</sub>

---

37

|   |          |          |          |
|---|----------|----------|----------|
| S | -0.61456 | -0.50034 | -0.65818 |
| O | -1.99994 | -1.01403 | -1.23573 |
| O | 0.32375  | -0.52546 | -1.77486 |
| O | -0.21752 | -1.46783 | 0.40997  |
| O | -0.84991 | 0.83925  | -0.09118 |
| H | -2.75580 | -0.72502 | -0.61465 |
| H | 2.40372  | -0.07323 | 0.34505  |
| C | 3.03388  | -1.80677 | -0.67195 |
| H | 4.07039  | -1.48154 | -0.77715 |
| H | 2.45126  | -1.54383 | -1.55284 |
| H | 3.00198  | -2.88681 | -0.52234 |
| N | 2.40855  | -1.13273 | 0.49184  |
| C | 3.02108  | -1.45673 | 1.79725  |
| H | 1.36403  | -1.37290 | 0.50645  |
| H | 4.06822  | -1.14959 | 1.80745  |
| H | 2.47829  | -0.93002 | 2.58171  |
| H | 2.95605  | -2.53038 | 1.97736  |
| N | -3.96719 | -0.12202 | 0.35942  |
| C | -4.19397 | 1.25523  | -0.10096 |
| C | -3.52623 | -0.19225 | 1.75970  |
| H | -4.81884 | -0.66328 | 0.24529  |
| H | -3.23683 | 1.77842  | -0.09744 |
| H | -4.56831 | 1.23616  | -1.12635 |
| H | -4.90950 | 1.80214  | 0.52995  |
| H | -2.56088 | 0.30859  | 1.84058  |
| H | -4.23765 | 0.28108  | 2.45203  |
| H | -3.39041 | -1.23687 | 2.04525  |
| N | 2.05784  | 1.66254  | 0.11567  |
| C | 2.39015  | 2.09651  | -1.24861 |
| C | 2.52886  | 2.59882  | 1.13887  |
| H | 1.03804  | 1.58030  | 0.17156  |
| H | 3.47347  | 2.05423  | -1.40187 |
| H | 1.89756  | 1.42782  | -1.95451 |
| H | 2.06017  | 3.12587  | -1.45000 |
| H | 3.62318  | 2.61980  | 1.15300  |
| H | 2.17700  | 3.62709  | 0.96874  |
| H | 2.17999  | 2.27868  | 2.12358  |

(H2SO4)1-(DMA)4

-----  
47

|   |          |          |          |
|---|----------|----------|----------|
| S | -0.00000 | -0.94033 | -0.00001 |
| O | 1.04696  | -1.82415 | -0.62905 |
| O | 0.64477  | -0.09180 | 1.04189  |
| O | -1.04696 | -1.82416 | 0.62903  |
| O | -0.64478 | -0.09180 | -1.04190 |
| N | -3.38268 | -1.03429 | -0.05984 |
| H | -3.28440 | 0.01259  | 0.03621  |
| H | -2.39028 | -1.40919 | 0.25933  |
| C | -4.43766 | -1.54423 | 0.83544  |

|   |          |          |          |
|---|----------|----------|----------|
| H | -5.41262 | -1.14396 | 0.54825  |
| H | -4.20826 | -1.24415 | 1.85786  |
| H | -4.46509 | -2.63364 | 0.78495  |
| C | -3.55411 | -1.38473 | -1.48728 |
| H | -4.48621 | -0.96688 | -1.87487 |
| H | -2.69469 | -0.98402 | -2.02272 |
| H | -3.56853 | -2.47059 | -1.59093 |
| C | 4.43767  | -1.54423 | -0.83542 |
| H | 4.46509  | -2.63364 | -0.78493 |
| H | 4.20828  | -1.24415 | -1.85784 |
| H | 5.41263  | -1.14396 | -0.54822 |
| C | 3.55409  | -1.38473 | 1.48729  |
| H | 3.56851  | -2.47060 | 1.59094  |
| H | 4.48619  | -0.96688 | 1.87490  |
| H | 2.69466  | -0.98403 | 2.02272  |
| N | -2.60721 | 1.71002  | 0.15458  |
| H | -1.79126 | 1.35645  | -0.35650 |
| C | -2.18101 | 2.07288  | 1.50955  |
| H | -1.57311 | 2.99091  | 1.52732  |
| H | -1.57645 | 1.26440  | 1.92310  |
| H | -3.05445 | 2.23850  | 2.14953  |
| C | -3.22479 | 2.81868  | -0.56846 |
| H | -4.16913 | 3.10066  | -0.09122 |
| H | -3.44119 | 2.51616  | -1.59590 |
| H | -2.58851 | 3.71733  | -0.60325 |
| N | 2.60721  | 1.71002  | -0.15457 |
| H | 1.79126  | 1.35645  | 0.35650  |
| C | 2.18103  | 2.07287  | -1.50955 |
| H | 3.05448  | 2.23848  | -2.14953 |
| H | 1.57313  | 2.99090  | -1.52734 |
| H | 1.57647  | 1.26439  | -1.92310 |
| C | 3.22478  | 2.81868  | 0.56847  |
| H | 4.16914  | 3.10065  | 0.09123  |
| H | 3.44117  | 2.51617  | 1.59591  |
| H | 2.58851  | 3.71733  | 0.60323  |
| N | 3.38267  | -1.03429 | 0.05985  |
| H | 3.28440  | 0.01259  | -0.03619 |
| H | 2.39028  | -1.40919 | -0.25933 |

DMA

-----  
10

|   |          |          |          |
|---|----------|----------|----------|
| N | 0.00000  | 0.56391  | -0.14859 |
| C | 1.21545  | -0.22252 | 0.02031  |
| C | -1.21545 | -0.22252 | 0.02031  |
| H | 0.00000  | 1.32911  | 0.51715  |
| H | 1.28278  | -0.96583 | -0.78047 |
| H | 2.08969  | 0.42794  | -0.06116 |
| H | 1.27538  | -0.76522 | 0.98130  |
| H | -1.28278 | -0.96583 | -0.78046 |
| H | -1.27538 | -0.76522 | 0.98130  |



|   |          |         |          |
|---|----------|---------|----------|
| H | -2.08969 | 0.42794 | -0.06117 |
|---|----------|---------|----------|

(H2SO4)2-(DMA)1

---

24

|   |          |          |          |
|---|----------|----------|----------|
| S | 1.45139  | -1.26063 | -0.09244 |
| O | 2.27682  | -0.26899 | -0.77460 |
| O | 0.85594  | -0.72110 | 1.15011  |
| O | 2.52756  | -2.37895 | 0.35079  |
| O | 0.46354  | -1.95225 | -0.92292 |
| H | 1.70707  | 1.29076  | -0.35818 |
| H | 2.04243  | -3.17598 | 0.60814  |
| S | -2.27733 | 0.02184  | 0.00577  |
| O | -1.75798 | -0.54126 | 1.38333  |
| O | -3.66585 | 0.29057  | 0.12903  |
| O | -2.10622 | -1.18325 | -0.99238 |
| O | -1.37624 | 1.09090  | -0.41108 |
| H | -0.76152 | -0.65560 | 1.35400  |
| H | -1.15060 | -1.46520 | -1.04751 |
| N | 1.14345  | 2.12353  | -0.06600 |
| H | 0.16818  | 1.76274  | -0.04535 |
| C | 1.23521  | 3.18616  | -1.10060 |
| H | 2.26749  | 3.52547  | -1.18068 |
| H | 0.58868  | 4.01804  | -0.82317 |
| H | 0.90698  | 2.76976  | -2.05139 |
| C | 1.55504  | 2.53434  | 1.30300  |
| H | 2.58939  | 2.87620  | 1.27881  |
| H | 1.46580  | 1.66453  | 1.95071  |
| H | 0.90496  | 3.33676  | 1.65072  |

(H2SO4)2-(DMA)2

---

34

|   |          |          |          |
|---|----------|----------|----------|
| H | 0.58654  | 1.56536  | 0.54566  |
| S | -2.55649 | -0.01115 | -0.37052 |
| O | -4.03888 | 0.07490  | 0.32066  |
| O | -2.28611 | 1.33009  | -0.91214 |
| O | -2.61493 | -1.06896 | -1.36015 |
| O | -1.70511 | -0.30561 | 0.79728  |
| H | -4.68176 | 0.12168  | -0.40054 |
| N | -0.08982 | 2.34883  | 0.38897  |
| H | -0.87207 | 1.95946  | -0.18775 |
| C | 0.59352  | 3.43694  | -0.35804 |
| H | 1.37495  | 3.86519  | 0.26933  |
| H | -0.13527 | 4.20219  | -0.62474 |
| H | 1.04897  | 3.00515  | -1.24660 |
| C | -0.66018 | 2.75018  | 1.70052  |
| H | 0.14267  | 3.09123  | 2.35393  |
| H | -1.15373 | 1.87923  | 2.12708  |
| H | -1.38594 | 3.54892  | 1.54923  |

|   |          |          |          |
|---|----------|----------|----------|
| H | -0.58652 | -1.56535 | 0.54567  |
| S | 2.55648  | 0.01114  | -0.37053 |
| O | 4.03884  | -0.07496 | 0.32070  |
| O | 1.70506  | 0.30557  | 0.79725  |
| O | 2.28610  | -1.33008 | -0.91222 |
| O | 2.61497  | 1.06898  | -1.36013 |
| H | 4.68175  | -0.12180 | -0.40049 |
| N | 0.08984  | -2.34881 | 0.38896  |
| H | 0.87205  | -1.95944 | -0.18780 |
| C | -0.59354 | -3.43693 | -0.35799 |
| H | -1.37494 | -3.86517 | 0.26943  |
| H | 0.13524  | -4.20219 | -0.62470 |
| H | -1.04902 | -3.00516 | -1.24654 |
| C | 0.66026  | -2.75012 | 1.70050  |
| H | -0.14256 | -3.09116 | 2.35395  |
| H | 1.15382  | -1.87916 | 2.12702  |
| H | 1.38601  | -3.54887 | 1.54920  |

(H2SO4)2-(DMA)3

-----  
44

|   |          |          |          |
|---|----------|----------|----------|
| S | 1.35153  | -0.29524 | -1.08858 |
| O | 2.73756  | -0.04037 | -1.56028 |
| C | -1.84545 | -3.37696 | 0.16606  |
| H | -2.92677 | -3.51688 | 0.16674  |
| H | -1.35040 | -4.29962 | -0.13909 |
| H | -1.51818 | -3.08386 | 1.16213  |
| N | 3.73412  | 0.00077  | 0.87957  |
| H | 3.69533  | -0.01980 | -0.17980 |
| H | 2.74229  | 0.32351  | 1.02081  |
| C | 4.72721  | 0.96348  | 1.39940  |
| C | 3.85719  | -1.39207 | 1.38192  |
| H | 4.83598  | -1.78928 | 1.11236  |
| H | 3.07138  | -1.98190 | 0.91065  |
| H | 3.73679  | -1.40122 | 2.46553  |
| H | 5.73194  | 0.63270  | 1.13482  |
| H | 4.53718  | 1.93894  | 0.95339  |
| H | 4.64025  | 1.03444  | 2.48406  |
| O | 1.14524  | -1.75481 | -0.85087 |
| O | 0.32580  | 0.23183  | -2.02389 |
| N | -1.48660 | -2.28524 | -0.76878 |
| C | -1.88310 | -2.50141 | -2.17938 |
| H | -1.92726 | -1.39288 | -0.41536 |
| H | -0.44183 | -2.11818 | -0.74595 |
| H | -1.43083 | -3.42235 | -2.54890 |
| H | -1.51348 | -1.65814 | -2.76072 |
| H | -2.96943 | -2.56619 | -2.25087 |
| C | 0.03590  | 3.46147  | -0.95727 |
| H | 0.89982  | 3.11169  | -0.39558 |
| H | -0.38085 | 4.35334  | -0.48840 |
| H | 0.32999  | 3.68044  | -1.98406 |

|   |          |          |          |
|---|----------|----------|----------|
| N | -0.97150 | 2.37700  | -0.94821 |
| C | -2.22348 | 2.67333  | -1.68354 |
| H | -1.22377 | 2.14509  | 0.05123  |
| H | -0.52250 | 1.51392  | -1.34753 |
| H | -2.89396 | 1.82776  | -1.54279 |
| H | -2.68088 | 3.57303  | -1.27097 |
| H | -2.00320 | 2.81874  | -2.74175 |
| S | -2.15816 | 0.34471  | 1.55571  |
| O | -3.05354 | -0.05572 | 2.60498  |
| O | -0.81247 | -0.53429 | 1.79463  |
| O | -1.72237 | 1.75686  | 1.56725  |
| O | -2.60071 | -0.02706 | 0.17852  |
| O | 1.18038  | 0.42858  | 0.25538  |
| H | -0.07229 | -0.14967 | 1.24912  |

(H2SO4)2-(DMA)4

54

|   |              |              |              |
|---|--------------|--------------|--------------|
| S | -1.459802000 | 0.387864000  | 0.861331000  |
| O | -2.874254000 | 0.715762000  | 1.487191000  |
| O | -0.943310000 | -0.818060000 | 1.532826000  |
| O | -0.628815000 | 1.569592000  | 1.127096000  |
| O | -1.690887000 | 0.148363000  | -0.587436000 |
| H | 0.752369000  | -0.632588000 | 2.134773000  |
| N | 0.005189000  | -2.029255000 | -1.400906000 |
| H | 0.965743000  | -1.840023000 | -0.905133000 |
| H | -0.573849000 | -1.192418000 | -1.215265000 |
| O | 2.926790000  | 0.632069000  | 0.402772000  |
| O | 2.029812000  | 0.215938000  | -1.821935000 |
| S | 2.947730000  | -0.352320000 | -0.750711000 |
| O | 2.278243000  | -1.623117000 | -0.248309000 |
| O | 4.284091000  | -0.597550000 | -1.245910000 |
| H | 2.202890000  | 0.054220000  | 1.617582000  |
| N | 1.693746000  | -0.366486000 | 2.477652000  |
| H | 0.464666000  | 2.182867000  | -0.156905000 |
| N | 0.947721000  | 2.436157000  | -1.037036000 |
| H | 1.409670000  | 1.507455000  | -1.376320000 |
| C | 2.021346000  | 3.423503000  | -0.776755000 |
| C | -0.073241000 | 2.867551000  | -2.017363000 |
| C | -0.641183000 | -3.202120000 | -0.770631000 |
| C | 1.537272000  | 0.674496000  | 3.519609000  |
| H | 0.033424000  | -4.056638000 | -0.830848000 |
| H | -0.845143000 | -2.955370000 | 0.269675000  |
| H | -1.575279000 | -3.437044000 | -1.284940000 |
| H | -0.839268000 | 2.095241000  | -2.067187000 |
| H | -0.524345000 | 3.808402000  | -1.697339000 |
| H | 0.395991000  | 2.997029000  | -2.993199000 |
| H | 2.732366000  | 2.959482000  | -0.096111000 |
| H | 2.522529000  | 3.656960000  | -1.716619000 |
| H | 1.598240000  | 4.333507000  | -0.347340000 |
| H | 0.924268000  | 1.474032000  | 3.107834000  |

|   |              |              |              |
|---|--------------|--------------|--------------|
| H | 2.520814000  | 1.054774000  | 3.797102000  |
| H | 1.044199000  | 0.251335000  | 4.396197000  |
| C | 0.261512000  | -2.169546000 | -2.853703000 |
| H | 0.797317000  | -1.280202000 | -3.178834000 |
| H | -0.680346000 | -2.287492000 | -3.393435000 |
| H | 0.891583000  | -3.044273000 | -3.016836000 |
| C | 2.441277000  | -1.571344000 | 2.910131000  |
| H | 1.908450000  | -2.070359000 | 3.721527000  |
| H | 3.432401000  | -1.269197000 | 3.249623000  |
| H | 2.542231000  | -2.221612000 | 2.043599000  |
| N | -4.703758000 | -0.059450000 | -0.253834000 |
| H | -4.002814000 | -0.198102000 | -0.978187000 |
| H | -3.627557000 | 0.391018000  | 0.863262000  |
| C | -5.387882000 | -1.323359000 | 0.033739000  |
| C | -5.610655000 | 1.025585000  | -0.640754000 |
| H | -6.233394000 | 0.771285000  | -1.509796000 |
| H | -6.271796000 | 1.261382000  | 0.196661000  |
| H | -5.026796000 | 1.917392000  | -0.873795000 |
| H | -6.041264000 | -1.192496000 | 0.899659000  |
| H | -5.999383000 | -1.678986000 | -0.807436000 |
| H | -4.649087000 | -2.087619000 | 0.280972000  |

(DMA)2

20

|   |          |          |          |
|---|----------|----------|----------|
| N | 1.56055  | -0.00021 | -0.09102 |
| H | 0.83910  | -0.00048 | 0.62417  |
| H | -0.83916 | -0.00050 | -0.62430 |
| N | -1.56054 | -0.00022 | 0.09096  |
| C | -2.35844 | 1.21547  | -0.00745 |
| C | -2.35938 | -1.21529 | -0.00739 |
| C | 2.35846  | 1.21546  | 0.00747  |
| C | 2.35936  | -1.21530 | 0.00742  |
| H | 1.70383  | -2.08933 | -0.00001 |
| H | 2.98973  | -1.26478 | 0.91297  |
| H | 3.02309  | -1.29140 | -0.85996 |
| H | 3.02212  | 1.29211  | -0.85991 |
| H | 2.98880  | 1.26536  | 0.91302  |
| H | 1.70227  | 2.08899  | 0.00011  |
| H | -3.02305 | -1.29136 | 0.86003  |
| H | -2.98980 | -1.26478 | -0.91291 |
| H | -1.70386 | -2.08933 | 0.00001  |
| H | -2.98889 | 1.26536  | -0.91292 |
| H | -3.02200 | 1.29214  | 0.86001  |
| H | -1.70224 | 2.08899  | -0.00018 |

(H2SO4)3-(DMA)1

31

|   |          |         |          |
|---|----------|---------|----------|
| S | -0.89127 | 1.75857 | -1.02002 |
|---|----------|---------|----------|

|   |          |          |          |
|---|----------|----------|----------|
| O | -1.55904 | 1.63499  | 0.29377  |
| O | 0.56027  | 1.90303  | -0.87236 |
| O | -1.45764 | 3.16998  | -1.54745 |
| O | -1.29413 | 0.74741  | -1.99074 |
| H | -0.26951 | 1.32196  | 1.54058  |
| H | -1.19804 | 3.27631  | -2.47492 |
| S | -2.01073 | -1.76168 | 0.23155  |
| O | -2.94901 | -0.60519 | 0.75339  |
| O | -0.63992 | -1.37502 | 0.57071  |
| O | -2.15824 | -1.71274 | -1.33339 |
| O | -2.53566 | -2.99793 | 0.68502  |
| H | -2.53170 | 0.28037  | 0.56959  |
| H | -1.82127 | -0.84379 | -1.68020 |
| N | 0.55527  | 1.16109  | 2.14643  |
| H | 1.21289  | 0.59165  | 1.57559  |
| C | 0.15774  | 0.37651  | 3.34769  |
| H | -0.56188 | 0.94946  | 3.93170  |
| H | 1.04432  | 0.16917  | 3.94535  |
| H | -0.28753 | -0.55608 | 3.00819  |
| C | 1.20143  | 2.47125  | 2.43385  |
| H | 0.51308  | 3.09556  | 3.00245  |
| H | 1.43769  | 2.94362  | 1.48265  |
| H | 2.11340  | 2.30011  | 3.00392  |
| S | 2.73875  | -0.90759 | -0.48354 |
| O | 4.01573  | -1.46592 | -0.74756 |
| O | 2.42698  | 0.12751  | -1.62978 |
| O | 2.47035  | -0.26479 | 0.79653  |
| H | 1.71237  | 0.76636  | -1.36912 |
| O | 1.66862  | -2.04887 | -0.68731 |
| H | 0.81988  | -1.83737 | -0.22442 |

(H2SO4)3-(DMA)2

-----  
41

|   |          |          |          |
|---|----------|----------|----------|
| S | 1.32581  | -2.05234 | -0.51314 |
| O | 2.69667  | -2.10538 | -0.93603 |
| O | 0.87840  | -3.56537 | -0.26802 |
| O | 1.12518  | -1.34479 | 0.78770  |
| O | 0.38247  | -1.49061 | -1.51869 |
| H | -1.81343 | 1.33280  | 0.43687  |
| N | 3.19616  | 0.64048  | 0.91958  |
| H | 2.47174  | -0.10430 | 0.94521  |
| H | 2.87868  | 1.29337  | 0.16508  |
| O | 0.41240  | 1.62027  | 0.62960  |
| O | 2.08840  | 2.36299  | -0.96841 |
| S | 0.65587  | 2.26455  | -0.67242 |
| O | -0.13459 | 3.47963  | -0.85582 |
| O | -0.00765 | 1.28296  | -1.78676 |
| H | 0.34796  | 0.37021  | -1.71771 |
| H | -0.01468 | -3.56284 | 0.13705  |
| H | -1.70483 | 2.84459  | -0.17123 |

|   |          |          |          |
|---|----------|----------|----------|
| N | -2.39342 | 2.15370  | 0.20111  |
| C | -3.00664 | 2.65719  | 1.45824  |
| C | -3.36349 | 1.79072  | -0.87145 |
| C | 4.51785  | 0.05570  | 0.56378  |
| C | 3.16921  | 1.37924  | 2.21054  |
| H | 2.16165  | 1.76496  | 2.34608  |
| H | 3.88344  | 2.20086  | 2.16517  |
| H | 3.43383  | 0.69926  | 3.01997  |
| H | 4.83175  | -0.62545 | 1.35422  |
| H | 5.24338  | 0.86128  | 0.45412  |
| H | 4.40822  | -0.49801 | -0.36535 |
| H | -4.00872 | 0.99153  | -0.51084 |
| H | -3.94915 | 2.67239  | -1.12970 |
| H | -2.79448 | 1.44877  | -1.73284 |
| H | -3.58424 | 3.55538  | 1.24314  |
| H | -3.65213 | 1.88322  | 1.87106  |
| H | -2.20586 | 2.88649  | 2.15894  |
| S | -2.31776 | -1.69739 | 0.45607  |
| O | -3.66061 | -1.40270 | 0.83341  |
| O | -2.20954 | -1.42229 | -1.09424 |
| O | -1.70652 | -2.96987 | 0.75799  |
| H | -1.25185 | -1.53466 | -1.37799 |
| O | -1.41366 | -0.54486 | 1.08614  |
| H | -0.43228 | -0.77316 | 1.03404  |

(H2SO4)3-(DMA)3

-----  
51

|   |          |          |          |
|---|----------|----------|----------|
| S | -0.74477 | -2.01125 | -0.51203 |
| O | 0.39370  | -2.92446 | -0.47233 |
| O | -1.92527 | -2.58020 | -1.17255 |
| O | -1.09006 | -1.40491 | 0.78495  |
| O | -0.23918 | -0.79630 | -1.45370 |
| H | 0.48999  | 2.50711  | -0.27133 |
| N | 2.79352  | -2.61906 | 0.81862  |
| H | 1.86774  | -2.63975 | 0.33452  |
| H | 3.34429  | -1.84299 | 0.36550  |
| O | 1.98014  | 0.34472  | 0.46497  |
| O | 4.08247  | -0.54614 | -0.39562 |
| S | 3.03609  | 0.47767  | -0.54768 |
| O | 3.54840  | 1.84096  | -0.69141 |
| O | 2.31493  | 0.18926  | -1.96979 |
| H | 1.49378  | -0.32199 | -1.80788 |
| H | -3.31613 | -1.79155 | -0.63059 |
| H | 2.11976  | 2.83920  | -0.40542 |
| N | 1.20973  | 3.23337  | -0.07720 |
| C | 1.29556  | 3.43188  | 1.39759  |
| C | 0.84305  | 4.45371  | -0.84071 |
| C | 3.47768  | -3.91435 | 0.58658  |
| C | 2.56709  | -2.27541 | 2.24669  |
| H | 2.08557  | -1.30067 | 2.27317  |

|   |          |          |          |
|---|----------|----------|----------|
| H | 3.52650  | -2.23429 | 2.76241  |
| H | 1.92649  | -3.03045 | 2.70217  |
| H | 2.87647  | -4.72314 | 1.00134  |
| H | 4.45910  | -3.89678 | 1.06016  |
| H | 3.59159  | -4.05876 | -0.48670 |
| H | -0.14568 | 4.77733  | -0.51950 |
| H | 1.58245  | 5.23261  | -0.65534 |
| H | 0.82449  | 4.20717  | -1.90131 |
| H | 2.06208  | 4.17764  | 1.60831  |
| H | 0.32285  | 3.75423  | 1.76344  |
| H | 1.56768  | 2.47550  | 1.83712  |
| S | -2.00942 | 1.89524  | 0.43506  |
| O | -2.00154 | 3.28760  | 0.80888  |
| O | -1.01804 | 1.58024  | -0.64128 |
| O | -3.32692 | 1.32464  | 0.11977  |
| H | -0.61943 | 0.07687  | -1.13893 |
| O | -1.45791 | 1.11630  | 1.73311  |
| H | -1.20598 | 0.20333  | 1.45480  |
| N | -4.10711 | -1.23537 | -0.22104 |
| C | -4.42591 | -1.78316 | 1.12260  |
| C | -5.24741 | -1.20217 | -1.16904 |
| H | -3.74075 | -0.25725 | -0.09892 |
| H | -4.79530 | -2.80358 | 1.02012  |
| H | -3.50873 | -1.77866 | 1.70786  |
| H | -5.17884 | -1.15569 | 1.59883  |
| H | -5.62141 | -2.21375 | -1.32720 |
| H | -6.03719 | -0.57078 | -0.76280 |
| H | -4.90099 | -0.78699 | -2.11422 |

(H2SO4)3-(DMA)4

-----  
61

|   |          |          |          |
|---|----------|----------|----------|
| S | -0.83631 | 2.06238  | 0.42711  |
| O | -2.28313 | 2.04710  | 0.79641  |
| O | -0.31011 | 3.42846  | 0.24038  |
| O | -0.05897 | 1.35927  | 1.51681  |
| O | -0.66673 | 1.28323  | -0.85461 |
| H | -0.53475 | -0.21911 | -0.62653 |
| N | -3.63721 | 0.88947  | -1.25143 |
| H | -3.12761 | 1.31809  | -0.42969 |
| H | -1.87771 | -1.11127 | 1.88719  |
| C | -3.52419 | 1.82725  | -2.39534 |
| H | -4.01710 | 2.76639  | -2.14343 |
| H | -3.98738 | 1.38517  | -3.27786 |
| H | -2.46427 | 2.00186  | -2.56806 |
| C | -5.02297 | 0.54248  | -0.85799 |
| H | -4.97502 | -0.19510 | -0.05831 |
| H | -5.54777 | 0.11252  | -1.71125 |
| H | -5.54154 | 1.43772  | -0.51405 |
| S | -1.73955 | -2.08688 | -0.64816 |
| O | -0.42899 | -1.21064 | -0.39486 |

|   |          |          |          |
|---|----------|----------|----------|
| O | -2.54876 | -1.98107 | 0.58449  |
| O | -1.18347 | -3.41843 | -0.88780 |
| O | -2.43952 | -1.50102 | -1.80405 |
| H | -3.13023 | 0.00021  | -1.48487 |
| N | 1.64216  | -3.06844 | -1.08797 |
| H | 1.84394  | -2.04116 | -0.94983 |
| H | 0.61067  | -3.18882 | -1.05525 |
| C | 2.25807  | -3.81690 | 0.04025  |
| H | 2.12216  | -4.88700 | -0.11733 |
| H | 3.31232  | -3.55445 | 0.10766  |
| H | 1.76351  | -3.51014 | 0.95929  |
| C | 2.15159  | -3.45723 | -2.42503 |
| H | 3.22269  | -3.26326 | -2.46695 |
| H | 1.95133  | -4.51409 | -2.60166 |
| H | 1.64293  | -2.85642 | -3.17742 |
| S | 3.20644  | -0.22111 | 0.45021  |
| O | 4.19067  | -1.19842 | 0.85123  |
| O | 2.54999  | -0.51694 | -0.84694 |
| O | 3.63986  | 1.18814  | 0.50235  |
| O | 2.03935  | -0.36328 | 1.56915  |
| H | 1.35479  | 0.33701  | 1.42762  |
| N | 2.24426  | 3.14664  | -0.70189 |
| H | 1.27852  | 3.28062  | -0.30339 |
| H | 2.70309  | 2.34860  | -0.18591 |
| C | 3.04788  | 4.36931  | -0.46860 |
| H | 2.59270  | 5.21249  | -0.98873 |
| H | 3.07256  | 4.56969  | 0.60159  |
| H | 4.06345  | 4.20970  | -0.83052 |
| C | 2.11702  | 2.74750  | -2.12754 |
| H | 1.65070  | 3.55793  | -2.68859 |
| H | 3.10721  | 2.52849  | -2.52625 |
| H | 1.49367  | 1.85728  | -2.16670 |
| N | -1.50385 | -0.56136 | 2.69589  |
| H | -0.95116 | 0.23471  | 2.26592  |
| C | -0.58214 | -1.42245 | 3.47867  |
| H | -1.10966 | -2.31771 | 3.80842  |
| H | -0.21457 | -0.86560 | 4.34057  |
| H | 0.26036  | -1.68776 | 2.84225  |
| C | -2.63851 | 0.00405  | 3.46581  |
| H | -3.29599 | -0.80021 | 3.79731  |
| H | -3.16968 | 0.69693  | 2.81608  |
| H | -2.25102 | 0.54706  | 4.32797  |

(DMA)3

-----  
30

|   |          |          |          |
|---|----------|----------|----------|
| O |          |          |          |
| N | -1.36556 | -1.21324 | -0.00346 |
| H | -0.34523 | -1.28702 | 0.00719  |
| H | -0.93603 | 0.93727  | -0.02038 |
| N | -0.36701 | 1.78745  | -0.01101 |



|   |          |          |          |
|---|----------|----------|----------|
| C | -0.61643 | 2.56416  | -1.21951 |
| C | -0.63007 | 2.54440  | 1.20714  |
| C | -1.89447 | -1.83872 | -1.20981 |
| C | -1.91685 | -1.79080 | 1.21680  |
| H | -1.43457 | -1.34139 | 2.08828  |
| H | -1.79322 | -2.88599 | 1.28371  |
| H | -2.98895 | -1.57616 | 1.28117  |
| H | -2.96475 | -1.62531 | -1.30370 |
| H | -1.77193 | -2.93593 | -1.22952 |
| H | -1.39430 | -1.42569 | -2.08941 |
| H | 0.08331  | 3.37057  | 1.29585  |
| H | -1.64503 | 2.97694  | 1.24943  |
| H | -0.50058 | 1.89796  | 2.07854  |
| H | -1.63105 | 2.99708  | -1.26631 |
| H | 0.09745  | 3.39192  | -1.28623 |
| H | -0.47650 | 1.93234  | -2.09995 |
| N | 1.73533  | -0.57825 | 0.00657  |
| H | 1.28229  | 0.33899  | -0.00126 |
| C | 2.52408  | -0.75018 | -1.20790 |
| C | 2.53198  | -0.72559 | 1.21911  |
| H | 1.89966  | -0.55849 | -2.08398 |
| H | 3.40414  | -0.08551 | -1.26263 |
| H | 2.88627  | -1.78144 | -1.27586 |
| H | 2.89427  | -1.75544 | 1.30576  |
| H | 3.41264  | -0.06025 | 1.25437  |
| H | 1.91339  | -0.51568 | 2.09527  |

(H2SO4)4-(DMA)1

-----  
38

|   |              |             |              |
|---|--------------|-------------|--------------|
| S | 3.927880000  | 3.741355000 | -0.922424000 |
| O | 3.419066000  | 5.185340000 | -1.314448000 |
| O | 4.212757000  | 3.856388000 | 0.637499000  |
| O | 5.168811000  | 3.532932000 | -1.573852000 |
| O | 2.830615000  | 2.805365000 | -1.098956000 |
| H | 2.567911000  | 5.392794000 | -0.861339000 |
| H | 3.352015000  | 3.899701000 | 1.116887000  |
| S | -2.157272000 | 6.723738000 | -0.537587000 |
| O | -2.344255000 | 6.865009000 | 1.030490000  |
| O | -0.801006000 | 7.493587000 | -0.823126000 |
| O | -3.200828000 | 7.448262000 | -1.160736000 |
| O | -1.945962000 | 5.316315000 | -0.838917000 |
| H | -1.718515000 | 6.266522000 | 1.497618000  |
| H | -0.037796000 | 6.951050000 | -0.521284000 |
| S | -0.158401000 | 2.079685000 | 3.991940000  |
| O | -1.089545000 | 3.351618000 | 4.104776000  |
| O | 1.308454000  | 2.677083000 | 4.129941000  |
| O | -0.285209000 | 1.536488000 | 2.650242000  |
| O | -0.402754000 | 1.267882000 | 5.127269000  |
| H | -0.935867000 | 3.967642000 | 3.349976000  |
| H | 1.534799000  | 3.162375000 | 3.301727000  |

|   |              |              |              |
|---|--------------|--------------|--------------|
| S | 0.603412000  | 4.636127000  | 1.052841000  |
| O | -0.135558000 | 3.603185000  | 0.088941000  |
| O | -0.391514000 | 5.098993000  | 2.029738000  |
| O | 1.126268000  | 5.716000000  | 0.204987000  |
| O | 1.670396000  | 3.823768000  | 1.665767000  |
| H | -0.872461000 | 4.104487000  | -0.354835000 |
| N | 1.262177000  | 0.984537000  | 0.365942000  |
| C | 0.347486000  | 0.335731000  | -0.614447000 |
| C | 2.304869000  | 0.080675000  | 0.927975000  |
| H | 0.700337000  | 1.362602000  | 1.148112000  |
| H | 1.733609000  | 1.782441000  | -0.093845000 |
| H | 2.927999000  | -0.293034000 | 0.117193000  |
| H | 1.819917000  | -0.743223000 | 1.448864000  |
| H | 2.914513000  | 0.649628000  | 1.627642000  |
| H | 0.932297000  | -0.034457000 | -1.455132000 |
| H | -0.366970000 | 1.080343000  | -0.957292000 |
| H | -0.175121000 | -0.484252000 | -0.124236000 |

(H2SO4)4-(DMA)2

-----

|    |              |              |              |
|----|--------------|--------------|--------------|
| 48 |              |              |              |
| S  | 1.576219000  | -1.790938000 | 0.127088000  |
| O  | 2.049519000  | -0.797192000 | -0.832378000 |
| O  | 0.700096000  | -1.154987000 | 1.141990000  |
| O  | 2.895851000  | -2.264608000 | 0.889566000  |
| H  | 0.919839000  | 0.486168000  | -0.761807000 |
| H  | 2.692748000  | -3.065784000 | 1.420343000  |
| S  | -2.629784000 | -1.028567000 | 0.653118000  |
| O  | -1.717665000 | -1.617124000 | 1.770496000  |
| O  | -3.982171000 | -1.332619000 | 1.042680000  |
| O  | -2.229672000 | -1.817991000 | -0.642119000 |
| H  | -0.727370000 | -1.507135000 | 1.543642000  |
| N  | 0.221839000  | 1.252913000  | -0.601723000 |
| C  | -0.042713000 | 1.970768000  | -1.875593000 |
| H  | 0.880945000  | 2.427420000  | -2.229346000 |
| H  | -0.799829000 | 2.736130000  | -1.708696000 |
| H  | -0.402854000 | 1.252241000  | -2.610207000 |
| C  | 0.725612000  | 2.107175000  | 0.508953000  |
| H  | 1.660979000  | 2.574291000  | 0.203104000  |
| H  | 0.895219000  | 1.461898000  | 1.368203000  |
| H  | -0.018501000 | 2.866841000  | 0.745467000  |
| H  | -2.427829000 | -2.797955000 | -0.505526000 |
| H  | -0.653896000 | 0.798551000  | -0.281620000 |
| O  | 0.968477000  | -2.976224000 | -0.481149000 |
| O  | -2.275249000 | 0.347275000  | 0.370226000  |
| S  | -3.447304000 | -4.898093000 | 1.060262000  |
| O  | -3.904968000 | -6.268583000 | 0.849501000  |
| O  | -2.601000000 | -4.815770000 | 2.276422000  |
| O  | -4.781277000 | -4.078891000 | 1.371042000  |
| H  | -2.787369000 | -7.260962000 | 1.682763000  |
| H  | -4.584836000 | -3.116978000 | 1.339538000  |
| S  | 0.738651000  | -5.177661000 | 2.033891000  |

|   |              |              |              |
|---|--------------|--------------|--------------|
| O | -0.195639000 | -4.054951000 | 2.575666000  |
| O | 2.083538000  | -4.692925000 | 2.205546000  |
| O | 0.376183000  | -5.295139000 | 0.512138000  |
| H | -1.180977000 | -4.284333000 | 2.431666000  |
| N | -2.099450000 | -7.784894000 | 2.276894000  |
| C | -1.809736000 | -9.108954000 | 1.667813000  |
| H | -2.728090000 | -9.693399000 | 1.624618000  |
| H | -1.062874000 | -9.627327000 | 2.268100000  |
| H | -1.426321000 | -8.951075000 | 0.660982000  |
| C | -2.636614000 | -7.834771000 | 3.664741000  |
| H | -3.567915000 | -8.399863000 | 3.666258000  |
| H | -2.821940000 | -6.810776000 | 3.981836000  |
| H | -1.904392000 | -8.308010000 | 4.317911000  |
| H | 0.578610000  | -4.417984000 | 0.056207000  |
| H | -1.228206000 | -7.222311000 | 2.292944000  |
| O | -2.815791000 | -4.285453000 | -0.110236000 |
| O | 0.380357000  | -6.462909000 | 2.598185000  |

(H2SO4)4-(DMA)3

-----  
58

|   |              |              |              |
|---|--------------|--------------|--------------|
| S | -1.099369000 | -1.910367000 | 0.694052000  |
| O | 0.170584000  | -2.638321000 | 0.673455000  |
| O | -2.278150000 | -2.772499000 | 0.775373000  |
| O | -1.075047000 | -0.846426000 | 1.728904000  |
| O | -1.235401000 | -1.166012000 | -0.713366000 |
| H | -0.421397000 | 2.658543000  | -0.786859000 |
| N | 1.495507000  | -0.623350000 | 2.905032000  |
| H | 0.635180000  | -0.770642000 | 2.345259000  |
| H | 2.015556000  | 0.170892000  | 2.457043000  |
| O | 1.612843000  | 0.845270000  | -0.129192000 |
| O | 2.979273000  | 1.361891000  | 1.820358000  |
| S | 2.769426000  | 1.619957000  | 0.391271000  |
| O | 2.686379000  | 3.033166000  | 0.039391000  |
| O | 4.058509000  | 1.091561000  | -0.390752000 |
| H | 4.049884000  | 0.105533000  | -0.375773000 |
| H | -3.583268000 | -2.178141000 | -0.156304000 |
| H | 1.129063000  | 3.293706000  | -0.672582000 |
| N | 0.203773000  | 3.418568000  | -1.137779000 |
| C | -0.366309000 | 4.741513000  | -0.765561000 |
| C | 0.381315000  | 3.212876000  | -2.599383000 |
| C | 2.363001000  | -1.833230000 | 2.847637000  |
| C | 1.088272000  | -0.221309000 | 4.275790000  |
| H | 0.456626000  | 0.663003000  | 4.206868000  |
| H | 1.977930000  | 0.007765000  | 4.861267000  |
| H | 0.531204000  | -1.033856000 | 4.741013000  |
| H | 1.810429000  | -2.691689000 | 3.225857000  |
| H | 3.251132000  | -1.652974000 | 3.452866000  |
| H | 2.648399000  | -2.004928000 | 1.812257000  |
| H | -0.586455000 | 3.294976000  | -3.092482000 |
| H | 1.068821000  | 3.963090000  | -2.988574000 |

|   |              |              |              |
|---|--------------|--------------|--------------|
| H | 0.793914000  | 2.218246000  | -2.758021000 |
| H | 0.269813000  | 5.529821000  | -1.167616000 |
| H | -1.379650000 | 4.817051000  | -1.153835000 |
| H | -0.401665000 | 4.809312000  | 0.319890000  |
| S | -2.839523000 | 1.813725000  | 0.196750000  |
| O | -3.085006000 | 3.228876000  | 0.129670000  |
| O | -1.596572000 | 1.402903000  | -0.543574000 |
| O | -3.964744000 | 0.946280000  | -0.179372000 |
| H | -1.260718000 | -0.162244000 | -0.616994000 |
| O | -2.507909000 | 1.505663000  | 1.737823000  |
| H | -2.058582000 | 0.629096000  | 1.791444000  |
| N | -4.309145000 | -1.676939000 | -0.718192000 |
| C | -5.655070000 | -1.949781000 | -0.153139000 |
| C | -4.146739000 | -2.034470000 | -2.151547000 |
| H | -4.098076000 | -0.657757000 | -0.583250000 |
| H | -5.873111000 | -3.015000000 | -0.226719000 |
| H | -5.659650000 | -1.641957000 | 0.891064000  |
| H | -6.400066000 | -1.375809000 | -0.703154000 |
| H | -4.350399000 | -3.096755000 | -2.284675000 |
| H | -4.838948000 | -1.443559000 | -2.750841000 |
| H | -3.119622000 | -1.817376000 | -2.437634000 |
| S | 2.777915000  | -2.025634000 | -1.702967000 |
| O | 3.491488000  | -1.619965000 | -0.495243000 |
| O | 1.788976000  | -3.190453000 | -1.342210000 |
| O | 3.506149000  | -2.445763000 | -2.850404000 |
| H | 1.170685000  | -2.950058000 | -0.596440000 |
| O | 1.829440000  | -0.830963000 | -2.104991000 |
| H | 1.723546000  | -0.194426000 | -1.331969000 |

(H2SO4)4-(DMA)4

-----  
68

|   |          |          |          |
|---|----------|----------|----------|
| S | -2.44882 | -2.02497 | 0.93130  |
| O | -0.96823 | -1.90648 | 0.81478  |
| O | -2.88234 | -0.74119 | 1.83113  |
| O | -3.08705 | -1.79653 | -0.38612 |
| O | -2.91889 | -3.17021 | 1.65681  |
| H | -4.20083 | -0.57904 | -0.50552 |
| N | 0.57952  | -0.16170 | 2.40452  |
| H | -0.08714 | -0.66805 | 1.78656  |
| H | 1.13216  | 0.47251  | 1.79998  |
| O | -3.57513 | 2.49257  | -0.00616 |
| O | -1.97775 | 1.60274  | -1.62841 |
| S | -2.17585 | 2.16669  | -0.28228 |
| O | -1.56592 | 1.30469  | 0.75463  |
| O | -1.41497 | 3.55789  | -0.20907 |
| H | -0.44343 | 3.38353  | -0.29608 |
| H | -2.44768 | 0.06592  | 1.44450  |
| H | -4.51371 | 1.05340  | -0.25267 |
| N | -4.95116 | 0.15884  | -0.56947 |
| C | -6.05412 | -0.22723 | 0.34782  |

|   |          |          |          |
|---|----------|----------|----------|
| C | -5.33963 | 0.32643  | -1.99349 |
| C | 1.48346  | -1.16740 | 3.02729  |
| C | -0.15148 | 0.67104  | 3.40141  |
| H | -0.73350 | 1.41237  | 2.86171  |
| H | 0.57793  | 1.15785  | 4.04779  |
| H | -0.80878 | 0.02818  | 3.98505  |
| H | 2.24030  | -0.64609 | 3.61260  |
| H | 1.93813  | -1.76316 | 2.24116  |
| H | 0.89363  | -1.81608 | 3.67393  |
| H | -5.68374 | -0.62874 | -2.38930 |
| H | -6.13200 | 1.07099  | -2.06802 |
| H | -4.46261 | 0.66980  | -2.53964 |
| H | -6.82006 | 0.54811  | 0.34508  |
| H | -6.47821 | -1.17552 | 0.01905  |
| H | -5.63689 | -0.34378 | 1.34660  |
| S | 2.16765  | -2.67989 | -0.63814 |
| O | 1.94147  | -1.19595 | -0.42856 |
| O | 1.32344  | -3.37918 | 0.54310  |
| O | 1.62042  | -3.10763 | -1.91067 |
| O | 3.54572  | -3.02873 | -0.34582 |
| H | 0.53370  | -0.66302 | -1.43816 |
| N | 4.45732  | -0.07629 | -0.30718 |
| H | 3.50154  | -0.51210 | -0.34059 |
| H | 4.28441  | 0.94570  | -0.39992 |
| O | 1.18311  | 2.88139  | -0.56502 |
| O | 3.59377  | 2.53481  | -0.60831 |
| S | 2.40242  | 2.71758  | 0.23010  |
| O | 2.31316  | 1.74942  | 1.32170  |
| O | 2.61739  | 4.11800  | 1.03444  |
| H | 2.69351  | 4.82455  | 0.37751  |
| H | 0.40034  | -3.03098 | 0.53706  |
| H | -0.72559 | 0.40709  | -1.80446 |
| N | -0.05193 | -0.27720 | -2.20630 |
| C | -0.83191 | -1.37346 | -2.85045 |
| C | 0.85072  | 0.45597  | -3.13253 |
| C | 5.25475  | -0.57025 | -1.46033 |
| C | 5.05717  | -0.37469 | 1.01902  |
| H | 4.43746  | 0.09813  | 1.77856  |
| H | 6.06675  | 0.03448  | 1.06147  |
| H | 5.07271  | -1.45503 | 1.15235  |
| H | 5.30945  | -1.65523 | -1.40308 |
| H | 6.24850  | -0.12312 | -1.43023 |
| H | 4.75063  | -0.27681 | -2.38012 |
| H | 1.57675  | -0.24535 | -3.54179 |
| H | 0.25599  | 0.89359  | -3.93363 |
| H | 1.34903  | 1.24752  | -2.57497 |
| H | -1.40406 | -0.94837 | -3.67556 |
| H | -0.14025 | -2.13612 | -3.19909 |
| H | -1.50650 | -1.79050 | -2.10491 |

(DMA)4

-----

|   |          |          |          |
|---|----------|----------|----------|
| N | 2.17446  | 0.08725  | 0.33009  |
| H | 1.56582  | -0.70732 | 0.10407  |
| H | 0.70796  | 1.56344  | -0.09782 |
| N | -0.08713 | 2.17044  | -0.32644 |
| C | -0.06807 | 3.34725  | 0.53541  |
| C | -0.03363 | 2.51700  | -1.74258 |
| C | 2.53100  | 0.03121  | 1.74362  |
| C | 3.34518  | 0.06979  | -0.54004 |
| H | 3.02790  | 0.04029  | -1.58519 |
| H | 4.01532  | -0.78906 | -0.36098 |
| H | 3.93452  | 0.98159  | -0.39566 |
| H | 3.06525  | 0.94217  | 2.03430  |
| H | 3.17548  | -0.82686 | 2.00292  |
| H | 1.62388  | -0.03141 | 2.34976  |
| H | -0.94500 | 3.04944  | -2.03533 |
| H | 0.82414  | 3.15934  | -2.00811 |
| H | 0.02759  | 1.60560  | -2.34242 |
| H | 0.79012  | 4.01640  | 0.34964  |
| H | -0.98042 | 3.93527  | 0.38904  |
| H | -0.03602 | 3.03730  | 1.58269  |
| N | -2.17406 | -0.08716 | 0.33123  |
| H | -1.56533 | 0.70745  | 0.10558  |
| C | -2.53248 | -0.03058 | 1.74426  |
| C | -3.34363 | -0.07037 | -0.54043 |
| H | -1.62621 | 0.03266  | 2.35158  |
| H | -3.17763 | 0.82738  | 2.00227  |
| H | -3.06679 | -0.94160 | 2.03466  |
| H | -3.93304 | -0.98217 | -0.39628 |
| H | -4.01412 | 0.78849  | -0.36277 |
| H | -3.02500 | -0.04145 | -1.58519 |
| N | 0.08728  | -2.17042 | -0.32638 |
| H | -0.70750 | -1.56347 | -0.09652 |
| C | 0.03122  | -2.51739 | -1.74232 |
| C | 0.07001  | -3.34697 | 0.53584  |
| H | -0.78849 | -4.01625 | 0.35197  |
| H | 0.98211  | -3.93497 | 0.38781  |
| H | 0.04004  | -3.03674 | 1.58309  |
| H | -0.82693 | -3.15994 | -2.00608 |
| H | 0.94213  | -3.04976 | -2.03660 |
| H | -0.03125 | -1.60617 | -2.34230 |
